# Supplementary material
Source: publisher figshare collection journal article supplement (https://aacr.figshare.com/articles/dataset/_/22433301)

Supplementary Figure 1

A

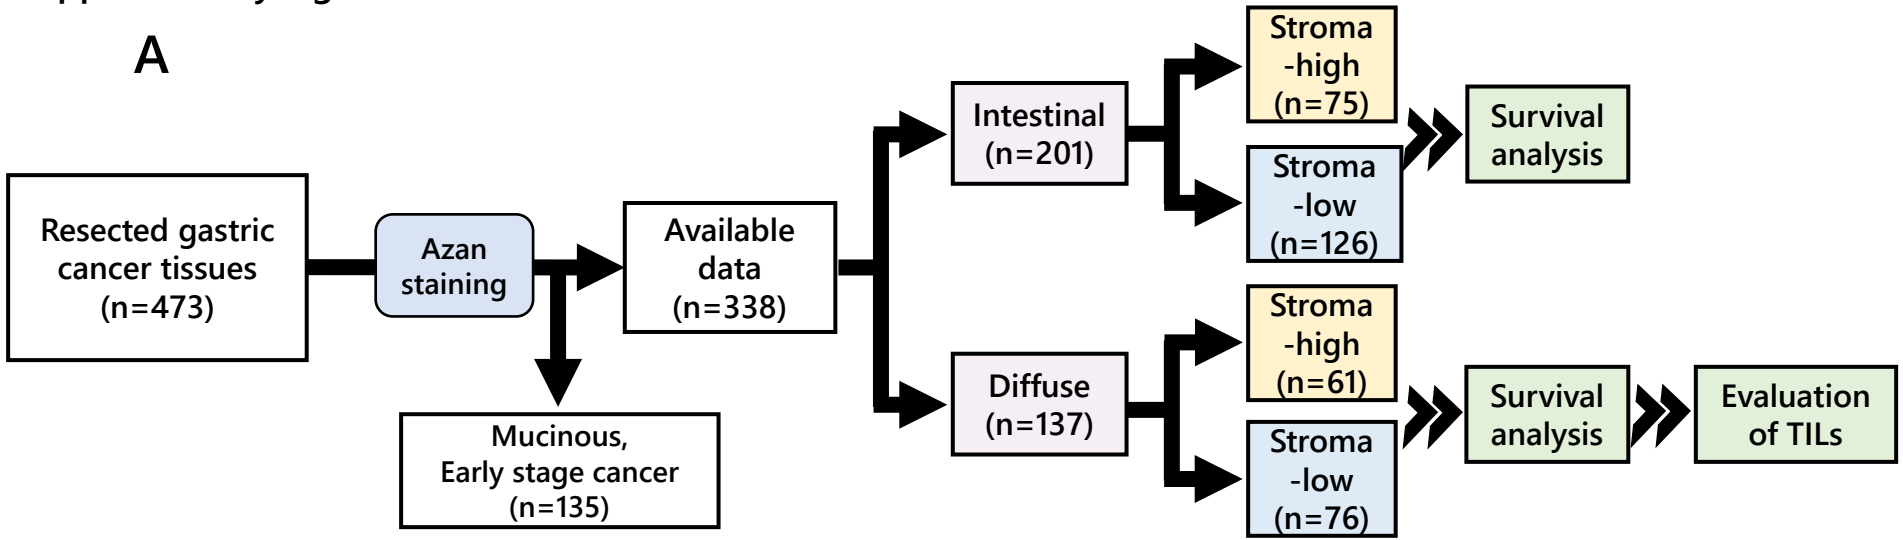

B

All cases

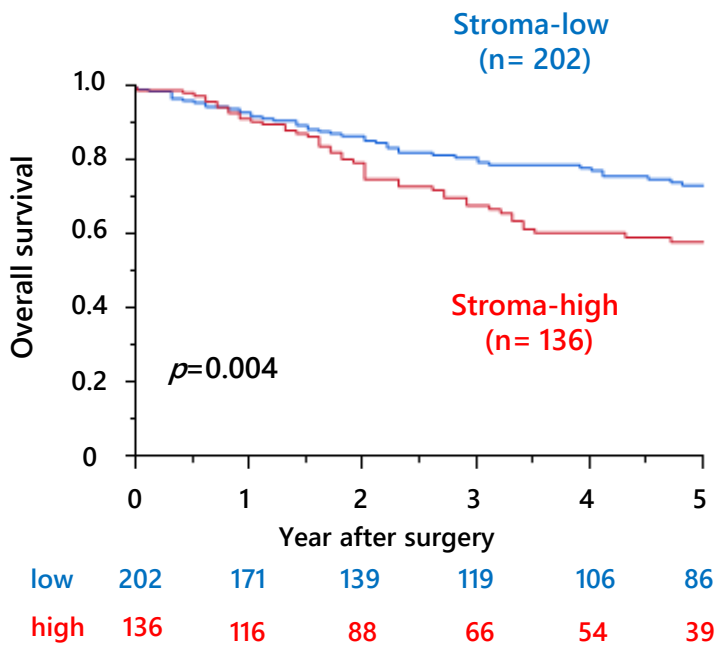

Supplement: Supplementary file 1 [file 39879738]
